# Supplementary material for: Thorium nanochemistry: the solution structure of the Th(iv)–hydroxo pentamer
Source: Royal Society of Chemistry journal article supplement (doi:10.1039/c2dt30243h), 2012-01-01

## Supplementary Information

**A.**

HEXS derived PDFs (top: sample 7, bottom: solution containing Th dimers, cf. Ref. <sup>3</sup>); middle: theoretical PDF based on the favoured DMD structure.

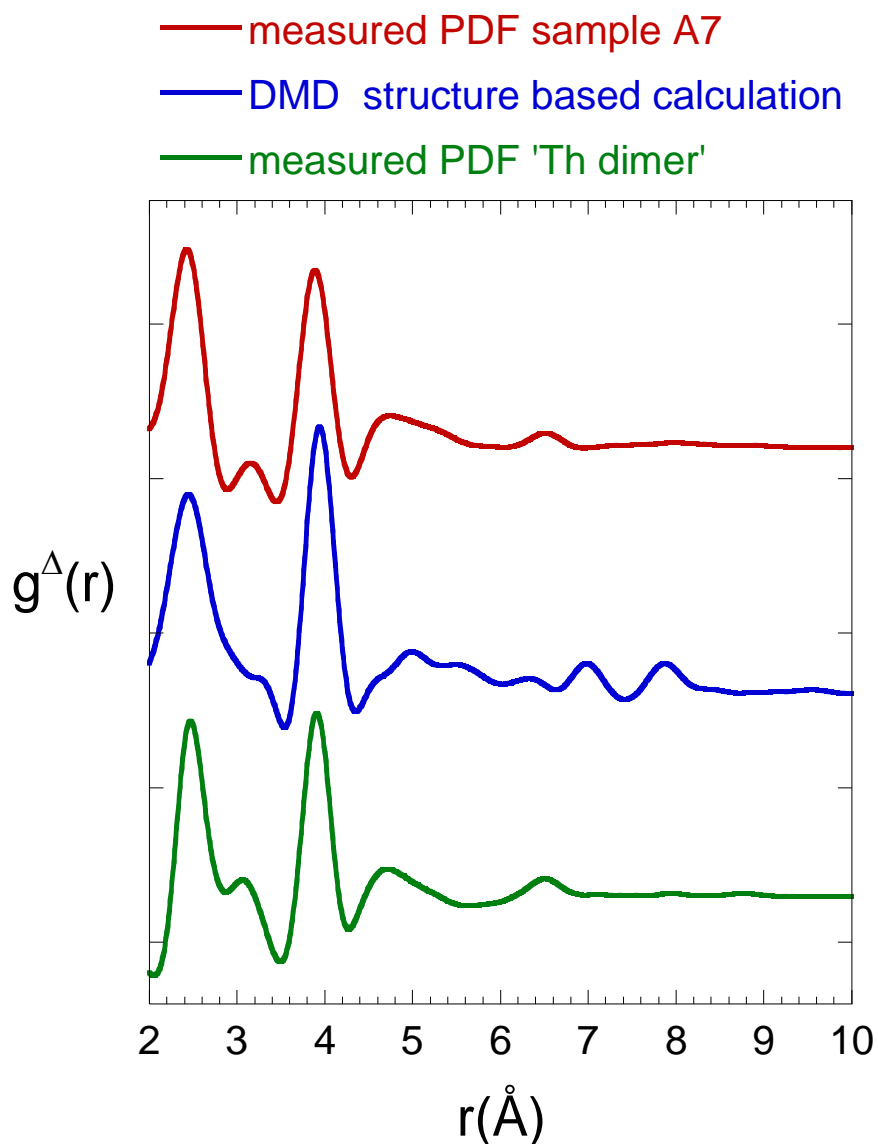

**B.**

Pentamer structures considered for quantum chemical calculations (cf. Table 3) in addition to the favoured DMD structure - including square-pyramides with different O/OH-bridges and a DMD derived structure, where the dimer bonds are broken and four monomers are binding to the central Th(IV) (5M):

1.  $\text{Th}_5\text{O}_4(\text{OH})_8(\text{H}_2\text{O})_{16}$  (pyramidal)

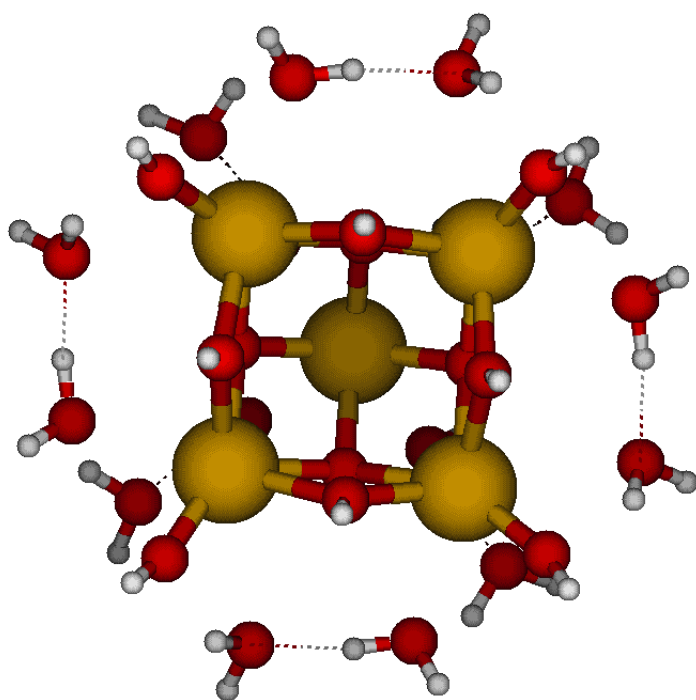

2.  $\text{Th}_5\text{O}_8(\text{H}_2\text{O})_{20}$  (pyramidal)

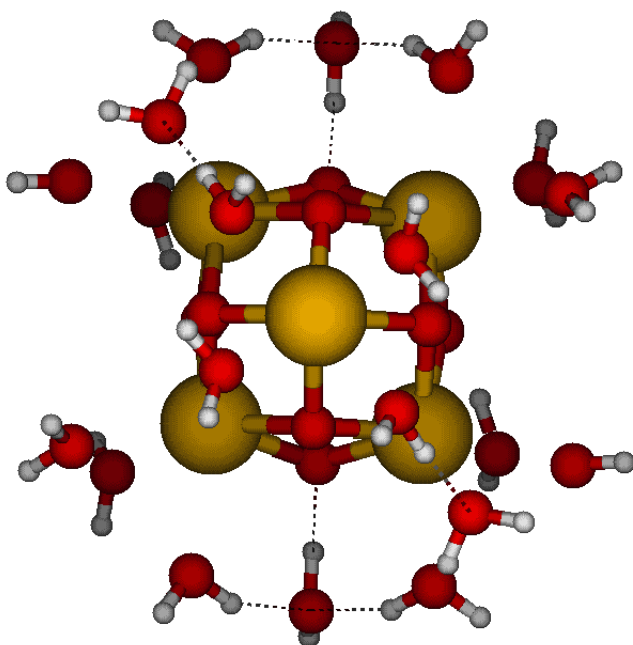

3.  $\text{Th}_5(\text{OH})_{16}(\text{H}_2\text{O})_{12}$  (pyramidal)

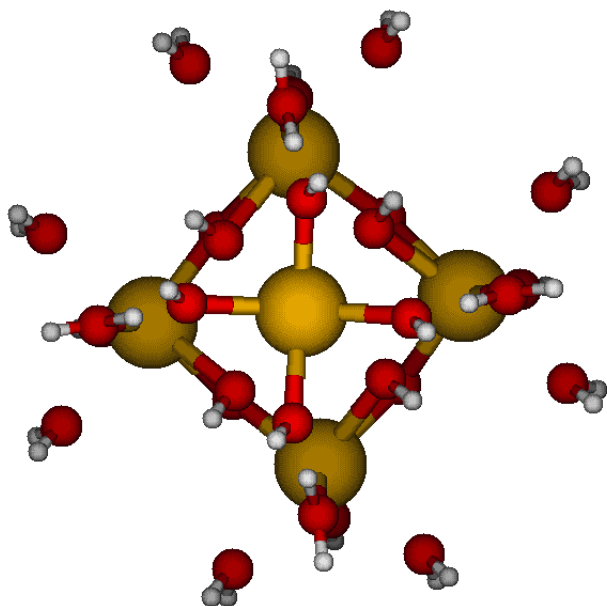

4.  $\text{Th}_5\text{O}_5(\text{OH})_8(\text{H}_2\text{O})_{16}$

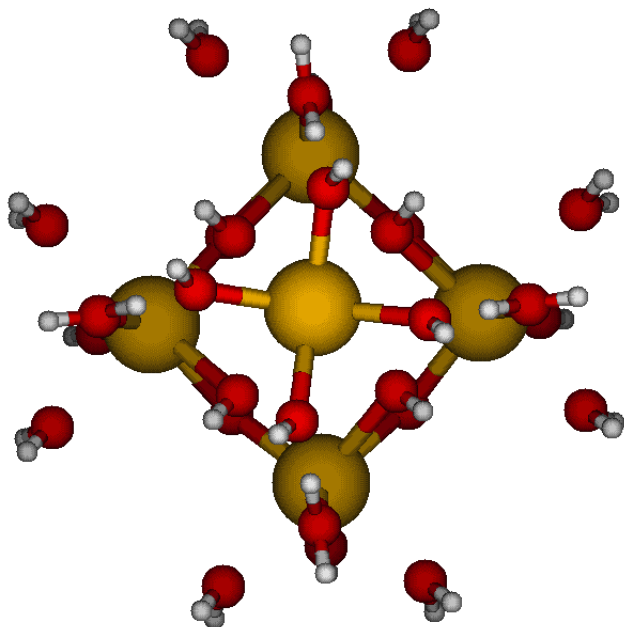

5.  $\text{Th}_5(\text{OH})_{16}(\text{H}_2\text{O})_{16}$  (5M)

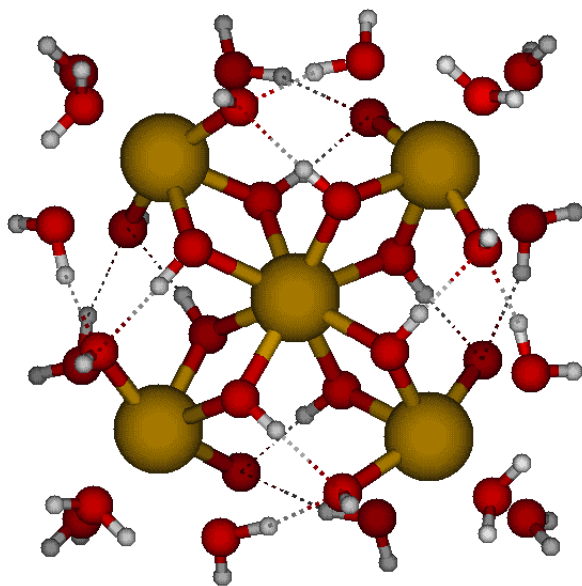

Supplement: c2dt30243h.pdf [file c2dt30243h.pdf]
